# Supplementary material
Source: PubMed Central journal article supplement (PMC10207623)
Supplement: 12909_2023_4358_MOESM1_ESM.pdf [file 12909_2023_4358_MOESM1_ESM.pdf]

1. Where do you practice critical care medicine (U.S. region)?

- New England (CT, MA, ME, NH, RI, VT)
- Mid-Atlantic (NJ, NY, PA)
- East North Central (IL, IN, MI, OH, WI)
- West North Central (IA, KS, MN, MO, ND, NE, SD)
- South Atlantic (DC, DE, FL, GA, MD, NC, SC, VA, WV)
- East South Central (AL, KY, MS, TN)
- West South Central (AR, LA, OK, TX)
- Mountain (AZ, CO, ID, MT, NM, NV, UT, WY)
- Pacific (AK, CA, HI, OR, WA)

2. What best describes your clinical practice setting?

- Academic center
- Community based, academic affiliated
- Community based
- Private practice
- Other - please specify

3. What is your role in the ICU?

- Attending physician
- Fellow

i. How many years ago did you graduate from critical care or pulmonary/critical care fellowship?

- < 5 years ago
- 5-10 years ago
- 11-20 years ago
- > 20 years ago
- I have not received fellowship training in critical care or pulmonary/critical care medicine

ii. Do you actively practice medicine in the intensive care unit?

- Yes
- No

iii. Do you supervise fellows in the ICU?

- Yes
- No

i. In what specialty is your training program?

- Pulmonary-Critical Care Medicine
- Critical Care Medicine
- Pulmonary Medicine
- Emergency medicine - critical care medicine
- Anesthesia critical care
- Neurocritical care
- Surgical critical care
- Other - please specify

ii. What year of fellowship are you in?

- First year
- Second year
- Third year
- Fourth year

iii. How many clinical fellows are in your program (all years)?

- < 5 fellows
- 5-10 fellows
- 11-15 fellows
- 16-20 fellows
- > 20 fellows
- Don't know

4. What is your gender?

- Female
- Male
- Prefer not to disclose

**5. How has the COVID-19 pandemic impacted the number of procedures (listed below) performed by fellows in your program? The number of procedures has:**

|                                                          | Increased greatly     | Increased slightly    | No change             | Decreased slightly    | Decreased greatly     |
|----------------------------------------------------------|-----------------------|-----------------------|-----------------------|-----------------------|-----------------------|
| Central line insertion                                   | <input type="radio"/> | <input type="radio"/> | <input type="radio"/> | <input type="radio"/> | <input type="radio"/> |
| Arterial line insertion                                  | <input type="radio"/> | <input type="radio"/> | <input type="radio"/> | <input type="radio"/> | <input type="radio"/> |
| Endotracheal intubation                                  | <input type="radio"/> | <input type="radio"/> | <input type="radio"/> | <input type="radio"/> | <input type="radio"/> |
| Bronchoscopy                                             | <input type="radio"/> | <input type="radio"/> | <input type="radio"/> | <input type="radio"/> | <input type="radio"/> |
| Chest tube placement                                     | <input type="radio"/> | <input type="radio"/> | <input type="radio"/> | <input type="radio"/> | <input type="radio"/> |
| Percutaneous tracheostomy                                | <input type="radio"/> | <input type="radio"/> | <input type="radio"/> | <input type="radio"/> | <input type="radio"/> |
| Thoracentesis                                            | <input type="radio"/> | <input type="radio"/> | <input type="radio"/> | <input type="radio"/> | <input type="radio"/> |
| Paracentesis                                             | <input type="radio"/> | <input type="radio"/> | <input type="radio"/> | <input type="radio"/> | <input type="radio"/> |
| Pulmonary artery catheter placement (Swan-Ganz catheter) | <input type="radio"/> | <input type="radio"/> | <input type="radio"/> | <input type="radio"/> | <input type="radio"/> |
| Point of care ultrasound                                 | <input type="radio"/> | <input type="radio"/> | <input type="radio"/> | <input type="radio"/> | <input type="radio"/> |

**6. In what ways has the pandemic changed fellowship education (compare education during the pandemic to education before the pandemic)?**

|                                                                                                                         | Increased greatly     | Increased slightly    | No change             | Decreased slightly    | Decreased greatly     | Don't know            |
|-------------------------------------------------------------------------------------------------------------------------|-----------------------|-----------------------|-----------------------|-----------------------|-----------------------|-----------------------|
| Number of didactic lectures                                                                                             | <input type="radio"/> | <input type="radio"/> | <input type="radio"/> | <input type="radio"/> | <input type="radio"/> | <input type="radio"/> |
| Number of in-person, hands-on workshops (e.g. procedural skills workshops, simulation training)                         | <input type="radio"/> | <input type="radio"/> | <input type="radio"/> | <input type="radio"/> | <input type="radio"/> | <input type="radio"/> |
| Bedside teaching by faculty                                                                                             | <input type="radio"/> | <input type="radio"/> | <input type="radio"/> | <input type="radio"/> | <input type="radio"/> | <input type="radio"/> |
| Fellow interaction with faculty                                                                                         | <input type="radio"/> | <input type="radio"/> | <input type="radio"/> | <input type="radio"/> | <input type="radio"/> | <input type="radio"/> |
| Fellow independence                                                                                                     | <input type="radio"/> | <input type="radio"/> | <input type="radio"/> | <input type="radio"/> | <input type="radio"/> | <input type="radio"/> |
| Diversity of cases seen during the pandemic, compared to before the pandemic                                            | <input type="radio"/> | <input type="radio"/> | <input type="radio"/> | <input type="radio"/> | <input type="radio"/> | <input type="radio"/> |
| Time fellows spend interacting with families                                                                            | <input type="radio"/> | <input type="radio"/> | <input type="radio"/> | <input type="radio"/> | <input type="radio"/> | <input type="radio"/> |
| Frequency of fellows performing a physical exam (in COVID-19 compared to non-COVID-19 patients)                         | <input type="radio"/> | <input type="radio"/> | <input type="radio"/> | <input type="radio"/> | <input type="radio"/> | <input type="radio"/> |
| Average weekly work hours for fellows                                                                                   | <input type="radio"/> | <input type="radio"/> | <input type="radio"/> | <input type="radio"/> | <input type="radio"/> | <input type="radio"/> |
| Time spent in ICU rotations                                                                                             | <input type="radio"/> | <input type="radio"/> | <input type="radio"/> | <input type="radio"/> | <input type="radio"/> | <input type="radio"/> |
| Time available for research and quality improvement                                                                     | <input type="radio"/> | <input type="radio"/> | <input type="radio"/> | <input type="radio"/> | <input type="radio"/> | <input type="radio"/> |
| In-person interactions with subspecialty consultants                                                                    | <input type="radio"/> | <input type="radio"/> | <input type="radio"/> | <input type="radio"/> | <input type="radio"/> | <input type="radio"/> |
| Frequency of subspecialty consultants performing a physical exam in COVID-19 patients compared to non-COVID-19 patients | <input type="radio"/> | <input type="radio"/> | <input type="radio"/> | <input type="radio"/> | <input type="radio"/> | <input type="radio"/> |

7. Has your program moved towards a video conferencing format for lectures?

- Yes, all lectures are conducted via video conferencing
- Yes, there is a mix of video conferences and in-person lectures
- No, all lectures are in person (socially distanced)
- No, we stopped using lectures as an educational tool
- Other - please specify

i. If yes: What impact has this had on fellow education?

- Positive impact - please specify (optional)
- Mixed impact - please specify (optional)
- Negative impact - please specify (optional)
- No impact

8. In what other ways has fellowship education changed during the COVID-19 pandemic?
